# Supplementary material for: The Apple Lipoxygenase MdLOX3 Regulates Salt Tolerance and ABA Sensitivity
Source: MDPI journal article supplement (doi:10.3390/horticulturae8070651), 2022-07-17
Supplement: s1 [file s1]

Supplementary Table S1: Primers for quantitative real-time PCR.

| Primer name        | Sequences (5'-3')                 |
|--------------------|-----------------------------------|
| <i>MdLOX3(PRI)</i> | F: GTCGACATGTCCGTACAACAGGCATTAG   |
| <i>MdLOX3(PRI)</i> | R: GAATTCGATTGATATACTATTCGGCACTCC |
| <i>MdLOX3(qRT)</i> | F: TCACCACTGGTTACGCACTC           |
| <i>MdLOX3(qRT)</i> | R: AAGGTGTACCGCATGTGAGG           |
| <i>18S</i>         | F: ACACGGGGAGGTAGTGACAA           |
| <i>18S</i>         | R: CCTCCAATGGATCCTCGTTA           |
| <i>AtACTIN</i>     | F: TTTGGAGCCTGGGACTATGGAT         |
| <i>AtACTIN</i>     | R: ACGGGGGAATGGGATGAGAT           |
